# Supplementary material for: The Impact of The Government’s COVID-19 Restriction Policies On Human Mobility: Evidence From The United States
Source: Research Square preprint supplement (doi:10.21203/rs.3.rs-1123806/v1), 2021-12-14
Supplement: Supplementary file 1 [file f13829a57d22dbffffb6dd7c.docx]

**Appendix**

Table 1. Data names and Data Sources

| **Data name** | | | **Source** |
| --- | --- | --- | --- |
| **Human Mobility during COVID-19** | **Some adult in household substituted some or all of their typical in-person work for telework because of the coronavirus pandemic** | | <https://www.census.gov/programs-surveys/household-pulse-survey/data.html> |
| **No changes to shopping trips because of the coronavirus pandemic** | | <https://www.census.gov/programs-surveys/household-pulse-survey/data.html> |
| **Have not taken fewer trips by bus, rail, or ride-sharing services than normal because of the coronavirus pandemic** | | <https://www.census.gov/programs-surveys/household-pulse-survey/data.html> |
| **Employment situation during COVID-19** | **Expected loss of employment income in next 4-weeks** | | <https://www.census.gov/programs-surveys/household-pulse-survey/data.html> |
| **Employed in the last 7 days** | | <https://www.census.gov/programs-surveys/household-pulse-survey/data.html> |
| **Applied for Unemployment Insurance Benefits who has received benefits** | | <https://www.census.gov/programs-surveys/household-pulse-survey/data.html> |
| **Food sufficiency in the last 7 days during COVID-19** | **Sometimes not enough to eat** | | <https://www.census.gov/programs-surveys/household-pulse-survey/data.html> |
| **Often not enough to eat** | | <https://www.census.gov/programs-surveys/household-pulse-survey/data.html> |
| **Mental health statue during COVID-19** | **Frequency of feeling nervous, anxious, or on edge** | | <https://www.census.gov/programs-surveys/household-pulse-survey/data.html> |
| **Frequency of feeling down, depressed, or hopeless** | | <https://www.census.gov/programs-surveys/household-pulse-survey/data.html> |
| **Current Health Insurance Status** | | <https://www.census.gov/programs-surveys/household-pulse-survey/data.html> |
| **Household mortgage** | **Confidence in ability to pay next month's mortgage** | **No confidence** | <https://www.census.gov/programs-surveys/household-pulse-survey/data.html> |
| **Slight confidence** | <https://www.census.gov/programs-surveys/household-pulse-survey/data.html> |
| **Social Security** | **Impact of coronavirus pandemic on decision to apply for benefits** | | <https://www.census.gov/programs-surveys/household-pulse-survey/data.html> |
| **Spending** | **Difficulty paying for usual household expenses during the coronavirus pandemic** | **Somewhat difficult** | <https://www.census.gov/programs-surveys/household-pulse-survey/data.html> |
| **very difficult** | <https://www.census.gov/programs-surveys/household-pulse-survey/data.html> |
| **Reasons for Changes to Household Spending on Goods and Services in the Last 7 Days** | **Concerned about going to public or crowded places or having contact with high-risk people** | <https://www.census.gov/programs-surveys/household-pulse-survey/data.html> |
| **Concerns about the economy** | <https://www.census.gov/programs-surveys/household-pulse-survey/data.html> |
| **COVID-19** | **New Confirm cases** | | <https://data.cdc.gov/Case-Surveillance/United-States-COVID-19-Cases-and-Deaths-by-State-o/9mfq-cb36> |
| **New Confirm death** | | [https://data.cdc.gov/Case-Surveillance/United-States-COVID-19-Cases-and-Deaths-by-State-o/9mfq-cb37](https://data.cdc.gov/Case-Surveillance/United-States-COVID-19-Cases-and-Deaths-by-State-o/9mfq-cb36) |
| **Government restriction** | **Stringency Index** | | <https://www.bsg.ox.ac.uk/research/research-projects/covid-19-government-response-tracker> |
| **Stringency Legacy Index** | | <https://www.bsg.ox.ac.uk/research/research-projects/covid-20-government-response-tracker> |
| **Government Response Index** | | <https://www.bsg.ox.ac.uk/research/research-projects/covid-21-government-response-tracker> |
| **Containment Health Index** | | <https://www.bsg.ox.ac.uk/research/research-projects/covid-22-government-response-tracker> |
| **Economic Support Index** | | <https://www.bsg.ox.ac.uk/research/research-projects/covid-23-government-response-tracker> |

Table 2. Indicator and variables description

| **Variables** | **Description** |
| --- | --- |
|  | **Status of attitude to taking trip** |
|  | Total number of people who are going trip |
|  | Total number of people who are going trip |
|  | Who are taking shopping trip as usual |
|  | Who are not taking fewer trips by bus, rail, or ride-sharing services than normal |
|  | **The government restriction** |
|  | Stringency Index |
|  | Stringency Legacy Index |
|  | Government Response Index |
|  | Containment Health Index |
|  | **Scale of COVID-19** |
|  | New confirmed cases |
|  | The number of deaths |
|  | **Economic environment** |
|  | Individual's expected losing income in the next four weeks |
|  | Individual was employed in the last 7 days |
|  | Individual has received Unemployment Insurance benefits |
|  | The number of people who had had enough food at times in the past 7 days |
|  | The number of people had not had enough food at all times in the past 7 days |
|  | The number of people feeling anxious |
|  | The number of people feeling stressed |
|  | Health insurance |
|  | The number of people who are no confident that they will be able to repay their household mortgage |
|  | The number of people who are slight confident that they will be able to repay their household mortgage |
|  | Social security |
|  | The number of people who are very difficult to pay their household spending |
|  | The number of people who are somewhat difficult to pay their household spending |
|  | The reason changing household spending because of concerned about going to public or crowded places or having contact with high-risk people |
|  | The reason changing household spending because of concerned for economic reasons |
|  | **Status of attitude to taking trip prediction sequence** |

Table 3. Data description

| Variables | Mean | Std. Dev. |
| --- | --- | --- |
|  | 7.317 | 0.090 |
|  | 5.950 | 0.485 |
|  | 5.987 | 0.451 |
|  | 5.332 | 0.531 |
|  | 1.596 | 0.176 |
|  | 1.679 | 0.139 |
|  | 1.685 | 0.100 |
|  | 1.698 | 0.094 |
|  | 5.261 | 0.615 |
|  | 3.504 | 0.656 |
|  | 6.367 | 0.444 |
|  | 6.229 | 0.440 |
|  | 5.505 | 0.534 |
|  | 5.279 | 0.489 |
|  | 4.725 | 0.512 |
|  | 5.842 | 0.459 |
|  | 5.671 | 0.467 |
|  | 6.409 | 0.437 |
|  | 4.583 | 0.510 |
|  | 4.861 | 0.489 |
|  | 6.217 | 0.441 |
|  | 5.683 | 0.471 |
|  | 5.538 | 0.490 |
|  | 6.028 | 0.496 |
|  | 5.833 | 0.474 |

Table 4. Unit root test results

| Variables and test | Level | | | | | | | | |
| --- | --- | --- | --- | --- | --- | --- | --- | --- | --- |
| Intercept | | | | Intercept and trend | | | | |
| Levin, Lin & Chu | Im, Pesaran and Shin W-stat | ADF - Fisher | PP - Fisher | Levin, Lin & Chu | Breitung t-stat | Im, Pesaran and Shin W-stat | ADF - Fisher | PP - Fisher |
|  | -14.745*** (0.00) | -10.304*** (0.00) | 293.474*** (0.00) | 354.438*** (0.00) | -15.967*** (0.00) | -3.399*** (0.00) | -6.402*** (0.00) | 231.395*** (0.00) | 332.706*** (0.00) |
|  | -26.148*** (0.00) | -16.641*** (0.00) | 455.494*** (0.00) | 808.89*** (0.00) | -23.411*** (0.00) | -8.521*** (0.00) | -6.983*** (0.00) | 304.077*** (0.00) | 677.630*** (0.00) |
|  | -34.915*** (0.00) | -19.479*** (0.00) | 516.117*** (0.00) | 576.389*** (0.00) | -35.673*** (0.00) | -8.765*** (0.00) | -9.545*** (0.00) | 383.340*** (0.00) | 460.007*** (0.00) |
|  | -23.794*** (0.00) | -16.297*** (0.00) | 433.12*** (0.00) | 819.216*** (0.00) | -20.260*** (0.00) | -9.067*** (0.00) | -7.077*** (0.00) | 285.792*** (0.00) | 736.177*** (0.00) |
|  | -21.558*** (0.00) | -12.928*** (0.00) | 336.689** (0.00) | 358.634*** (0.00) | -22.290*** (0.00) | -7.161*** (0.00) | -8.018*** (0.00) | 268.149*** (0.00) | 377.282*** (0.00) |
|  | -21.679*** (0.00) | -13.046*** (0.00) | 342.861*** (0.00) | 372.924*** (0.00) | -19.041*** (0.00) | -5.442*** (0.00) | -6.855*** (0.00) | 258.846*** (0.00) | 382.967*** (0.00) |
|  | -16.531*** (0.00) | -11.026*** (0.00) | 296.394*** (0.00) | 313.495*** (0.00) | -17.001*** (0.00) | -6.008*** (0.00) | -5.877*** (0.00) | 228.978*** (0.00) | 327.657*** (0.00) |
|  | -18.398*** (0.00) | -11.618*** (0.00) | 312.504*** (0.00) | 347.339*** (0.00) | -19.774*** (0.00) | -6.847*** (0.00) | -7.275*** (0.00) | 254.645*** (0.00) | 363.894*** (0.00) |
|  | -22.62*** (0.00) | -14.099*** (0.00) | 366.72*** (0.00) | 463.753*** (0.00) | -19.866*** (0.00) | -7.334*** (0.00) | -6.932*** (0.00) | 253.867*** (0.00) | 438.955*** (0.00) |
|  | -23.277*** (0.00) | -14.947*** (0.00) | 378.709*** (0.00) | 445.902*** (0.00) | -19.647*** (0.00) | -7.247*** (0.00) | -7.164*** (0.00) | 255.865*** (0.00) | 459.242*** (0.00) |
|  | -46.059*** (0.00) | -25.91*** (0.00) | 659.54*** (0.00) | 477.194*** (0.00) | -58.317*** (0.00) | -9.299*** (0.00) | -16.515*** (0.00) | 553.552*** (0.00) | 351.060*** (0.00) |
|  | -21.935*** (0.00) | -14.286*** (0.00) | 376.127*** (0.00) | 441.438*** (0.00) | -21.094*** (0.00) | -8.286*** (0.00) | -7.379*** (0.00) | 279.884*** (0.00) | 421.135*** (0.00) |
|  | -27.844*** (0.00) | -16.392*** (0.00) | 454.151*** (0.00) | 714.586*** (0.00) | -26.314*** (0.00) | -8.533*** (0.00) | -7.095*** (0.00) | 315.385*** (0.00) | 594.944*** (0.00) |
|  | -29.354*** (0.00) | -18.131*** (0.00) | 463.489*** (0.00) | 488.43*** (0.00) | -31.791*** (0.00) | -5.637*** (0.00) | -9.797*** (0.00) | 355.224*** (0.00) | 387.834*** (0.00) |
|  | -21.567*** (0.00) | -13.858*** (0.00) | 362.092*** (0.00) | 421.726*** (0.00) | -21.727*** (0.00) | -5.875*** (0.00) | -7.139*** (0.00) | 273.112*** (0.00) | 390.466*** (0.00) |
|  | -47.921*** (0.00) | -26.223*** (0.00) | 643.701*** (0.00) | 553.434*** (0.00) | -70.197*** (0.00) | -9.477*** (0.00) | -18.108*** (0.00) | 542.844*** (0.00) | 433.726*** (0.00) |
|  | -41.518*** (0.00) | -23.413*** (0.00) | 569.213*** (0.00) | 484.375*** (0.00) | -50.185*** (0.00) | -8.125*** (0.00) | -13.622*** (0.00) | 465.050*** (0.00) | 411.337*** (0.00) |
|  | -21.685*** (0.00) | -13.495*** (0.00) | 363.864*** (0.00) | 446.899*** (0.00) | -26.073*** (0.00) | -8.912*** (0.00) | -7.797*** (0.00) | 291.667*** (0.00) | 398.074*** (0.00) |
|  | -24.126*** (0.00) | -16.695*** (0.00) | 431.395*** (0.00) | 506.048*** (0.00) | -21.706*** (0.00) | -6.441*** (0.00) | -7.972*** (0.00) | 302.856*** (0.00) | 443.114*** (0.00) |
|  | -21.406*** (0.00) | -13.263*** (0.00) | 357.003*** (0.00) | 437.077*** (0.00) | -22.814*** (0.00) | -5.589*** (0.00) | -7.525*** (0.00) | 284.164*** (0.00) | 425.234*** (0.00) |
|  | -25.227*** (0.00) | -15.192*** (0.00) | 412.581*** (0.00) | 459.988*** (0.00) | -33.194*** (0.00) | -8.334*** (0.00) | -9.944*** (0.00) | 359.291*** (0.00) | 412.433*** (0.00) |
|  | -24.386*** (0.00) | -15.663*** (0.00) | 418.676*** (0.00) | 575.388*** (0.00) | -25.568*** (0.00) | -8.623*** (0.00) | -8.102*** (0.00) | 322.088*** (0.00) | 522.557*** (0.00) |
|  | -38.029*** (0.00) | -23.562*** (0.00) | 590.203*** (0.00) | 507.236*** (0.00) | -40.946*** (0.00) | -7.114*** (0.00) | -13.348*** (0.00) | 483.080*** (0.00) | 431.706*** (0.00) |
|  | -30.167*** (0.00) | -17.278*** (0.00) | 476.145*** (0.00) | 579.941*** (0.00) | -30.277*** (0.00) | -8.473*** (0.00) | -8.313*** (0.00) | 354.947*** (0.00) | 470.276*** (0.00) |
|  | -41.293*** (0.00) | -23.147*** (0.00) | 601.327*** (0.00) | 549.152*** (0.00) | -42.017*** (0.00) | -9.226*** (0.00) | -12.295*** (0.00) | 474.027*** (0.00) | 437.870*** (0.00) |

Notes: *** denotes significance level at 1%.
